# Supplementary material for: Proteome-wide detection of S-nitrosylation targets and motifs using bioorthogonal cleavable-linker-based enrichment and switch technique
Source: PubMed Central journal article supplement (PMC6522481; doi:10.1038/s41467-019-10182-4), 2019-05-16
Supplement: 41467_2019_10182_MOESM1_ESM.pdf [file 41467_2019_10182_MOESM1_ESM.pdf]

**Proteome-wide detection of S-nitrosylation targets and motifs using  
bioorthogonal cleavable-linker-based enrichment and switch technique**

Mnatsakanyan et al.

**Supplementary Figures.**

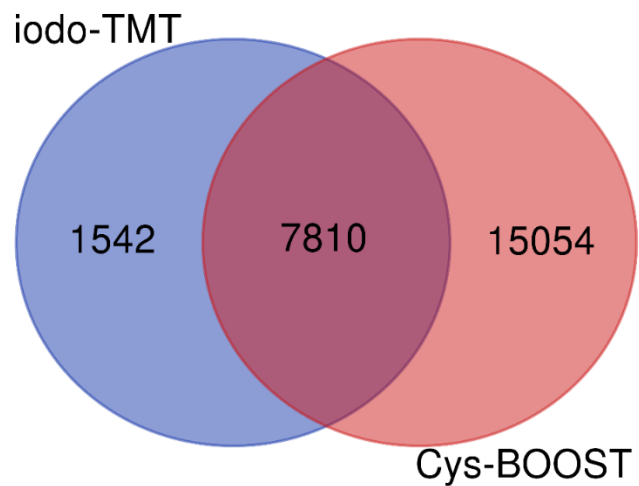

**Supplementary Figure 1.** Venn diagram showing the overlap of total unique Cys peptides enriched by iodoTMT and Cys-BOOST. Source data are provided as a Source Data file.

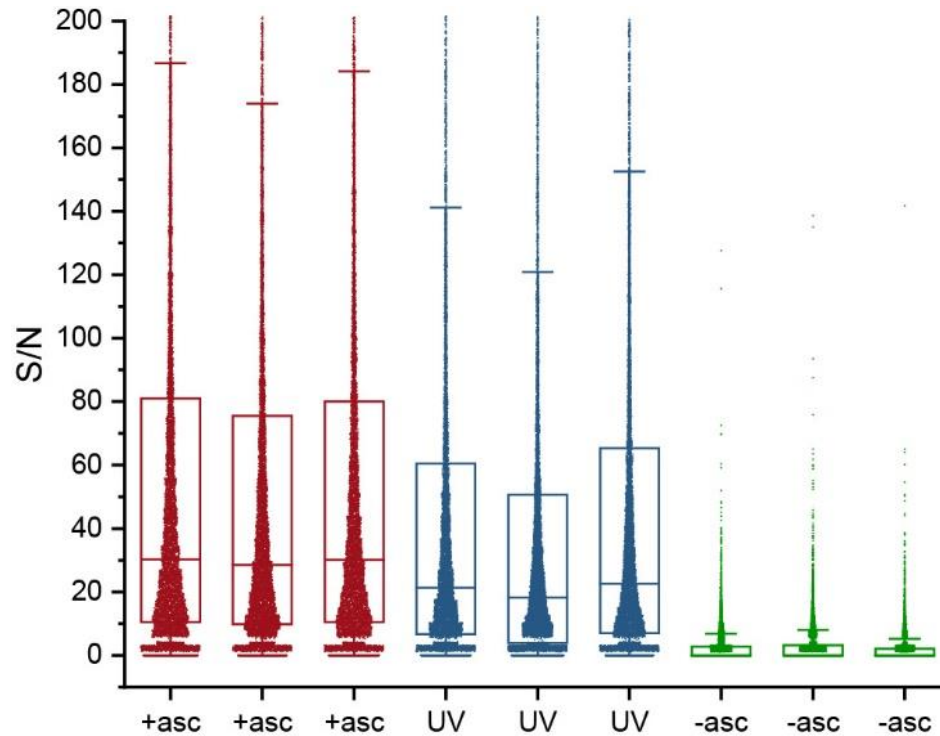

**Supplementary Figure 2.** Analysis of SNO reduction conditions (20 mM Na ascorbate (+asc), 10 min UV (UV) and control (– Na ascorbate (–asc)) in 200  $\mu$ M GSNO-treated HeLa lysates. SNO peptides were analyzed according to the Cys-BOOST workflow. Free Cys were blocked with 100 mM IAA, excess of the reagent was removed by double acetone precipitation. SNO was switched with 3 mM IAA-alkyne (IAA-alk) in the presence (+asc) or absence (–asc) of 20 mM Na ascorbate or after 10 min exposure to UV light. After tryptic digestion, TMT labeling, enrichment and on-tip pH 10 fractionation the SNO peptides were analyzed by LC-MS3 in synchronous precursor selection (SPS) mode. The data was analyzed using Proteome discoverer (PD) v2.2. No normalization of total protein amount was applied, as the low (< 5 %) RSDs of reporter ion intensities observed for background peptides present in the Cys-BOOST flow through (1  $\mu$ g measured by LC-SPS), confirm that the protein amounts in all samples were equivalent (Supplementary Data 3a). The amount of switched SNO peptides was relatively quantified in each sample based on the TMT reporter ion intensities (S/N). Boxplots of S/N of 7575 SNO peptide spectra match (PSMs) considered for quantification (average reporter S/N threshold  $\geq 10$ , without carbamidomethylation (CAM) on Cys and oxidation on Met) show comparable S/N for +asc and UV reduction. The mean ( $\square$ ) S/N of the –asc samples (n=3, workflow replicates) is 2.6, the median is 0.56 (center line), with an average of 7.2 % of PSMs having S/N  $\geq 10$  (Supplementary Data 3b). Box limits are the 75 and 25% percentiles, i.e. the interquartile range (IQR); the whiskers correspond to the highest or lowest respective value or if the lowest or highest value is an outlier (greater than  $1.5 * \text{IQR}$  from the bounds of the boxes) it is exactly  $1.5 * \text{IQR}$ . Accordingly, the –asc control indicates the near completeness of the first blocking step using 100 mM IAA. The weak remaining signals in –asc samples, mostly below the limit of quantification (LOQ S/N  $\geq 10$ ), can be most likely attributed to the SNO reduction by negligible exposure to light. Source data are provided as a Source Data file.

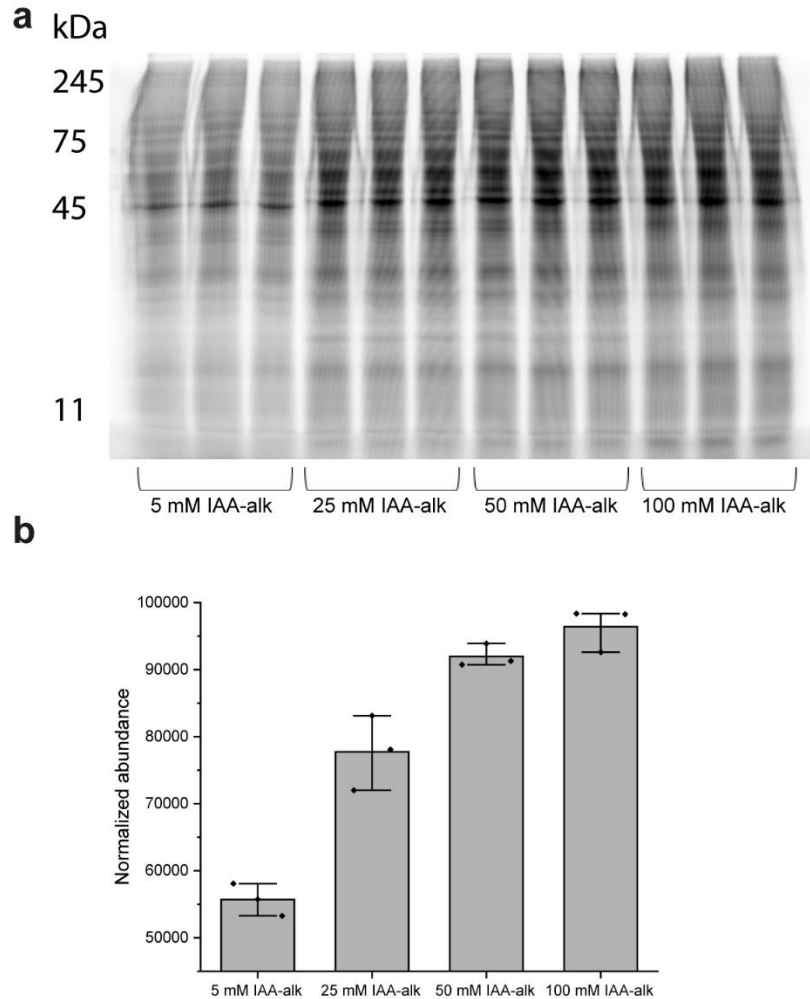

**Supplementary Figure 3.** Total free Cys labeling with increasing concentrations of IAA-alk. Total Cys of HeLa cell lysates (2 mg/mL) were reduced with 5 mM TCEP for 1 h at 56 °C, the pH of the samples was adjusted with 200 mM HEPES (pH 7.5), then the samples were labeled with 5 mM, 25 mM, 50 mM or 100 mM IAA-alk for 30 min at 25 °C. Excess of the reagents was removed by acetone precipitation and fluorescent 5-TAMRA-azide (Carl Roth) was introduced using CuAAC. 5 µg of each lysate were separated by SDS-PAGE, followed by fluorescence detection at 580 nm (Typhoon Trio, GE Healthcare) **a**. Afterwards, the gel was stained with Coomassie Brilliant Blue solution (gel not shown, provided in the Source Data file). Fluorescence signal intensities and protein abundance (based on Coomassie staining) were quantified using ImageJ. The fluorescence signal shows on average a 4.6 % increase in 100 mM compared to 50 mM IAA-alk labeled samples **b**, indicating the saturation of labeling at 100 mM. The fluorescence signal was normalized to protein abundance (Coomassie staining) in each lane, error bars represent the minimum and maximum values of n=3 technical replicates. Source data are provided as a Source Data file.

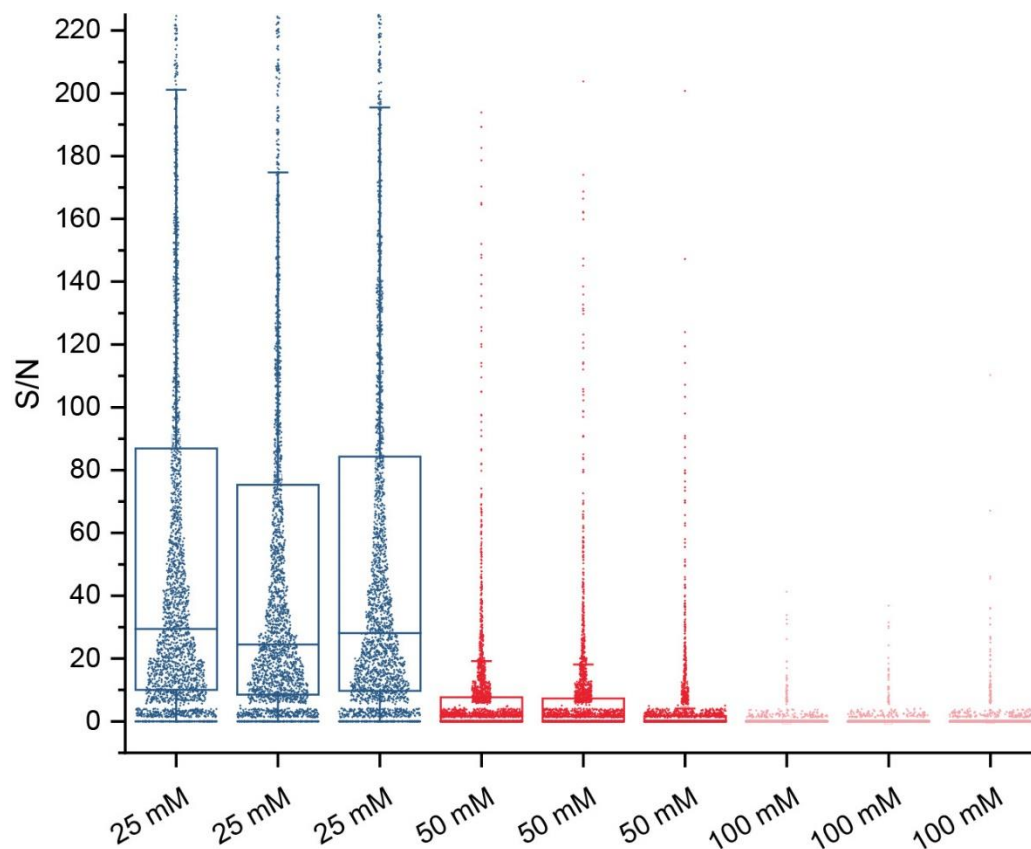

**Supplementary Figure 4.** Analysis of completeness of IAA blocking of free Cys in the initial step of the ST. The free Cys in SH-SY5Y cell lysates (2 mg/mL in HENS) were blocked with 25 mM, 50 mM or 100 mM IAA for 30 min at 25 °C, in triplicate. Excess of the reagents was removed by double acetone precipitation. The pellets were resolubilized and a second labeling step with 10 mM IAA-alk was applied for blocking of the remaining free Cys. After tryptic digestion and TMT labeling the IAA-alk labeled peptides were enriched using Cys-BOOST workflow. The eluate was analyzed by LC-SPS. The data was analyzed using Proteome discoverer (PD) v2.2. No normalization of total protein amount was applied, as low (< 5 %) RSDs of reporter ion intensities observed for background peptides present in the Cys-BOOST flow through (1  $\mu$ g measured by LC-SPS), confirm that the protein amounts in all samples were equivalent (Supplementary Data 4a). The amount of the remaining free Cys after IAA blocking was relatively quantified in each sample based on the TMT reporter ion intensities (S/N). Boxplots of S/N of 2521 PSMs considered for quantification (average reporter S/N threshold  $\geq 10$ , without CAM on Cys and oxidation on Met) show drastic reduction of remaining free Cys after 50 mM and 100 mM IAA blocking compared to 25 mM. The mean ( $\square$ ) S/N is 6.3 and 0.4, the median (center line) is 0.9 and 0, with on average 15 % and 1% of PSMs having S/N  $\geq 10$  in 50 mM and 100 mM IAA blocked samples respectively (Supplementary Data 4b). Box limits are the 75 and 25% percentiles, i.e. the interquartile range (IQR); whiskers correspond to the highest or lowest respective value or if the lowest or highest value is an outlier (greater than  $1.5 \cdot$  IQR from the bounds of the boxes) it is exactly  $1.5 \cdot$  IQR. Hence, confirming the completeness of the free Cys blocking with 100 mM IAA. Source data are provided as a Source Data file.

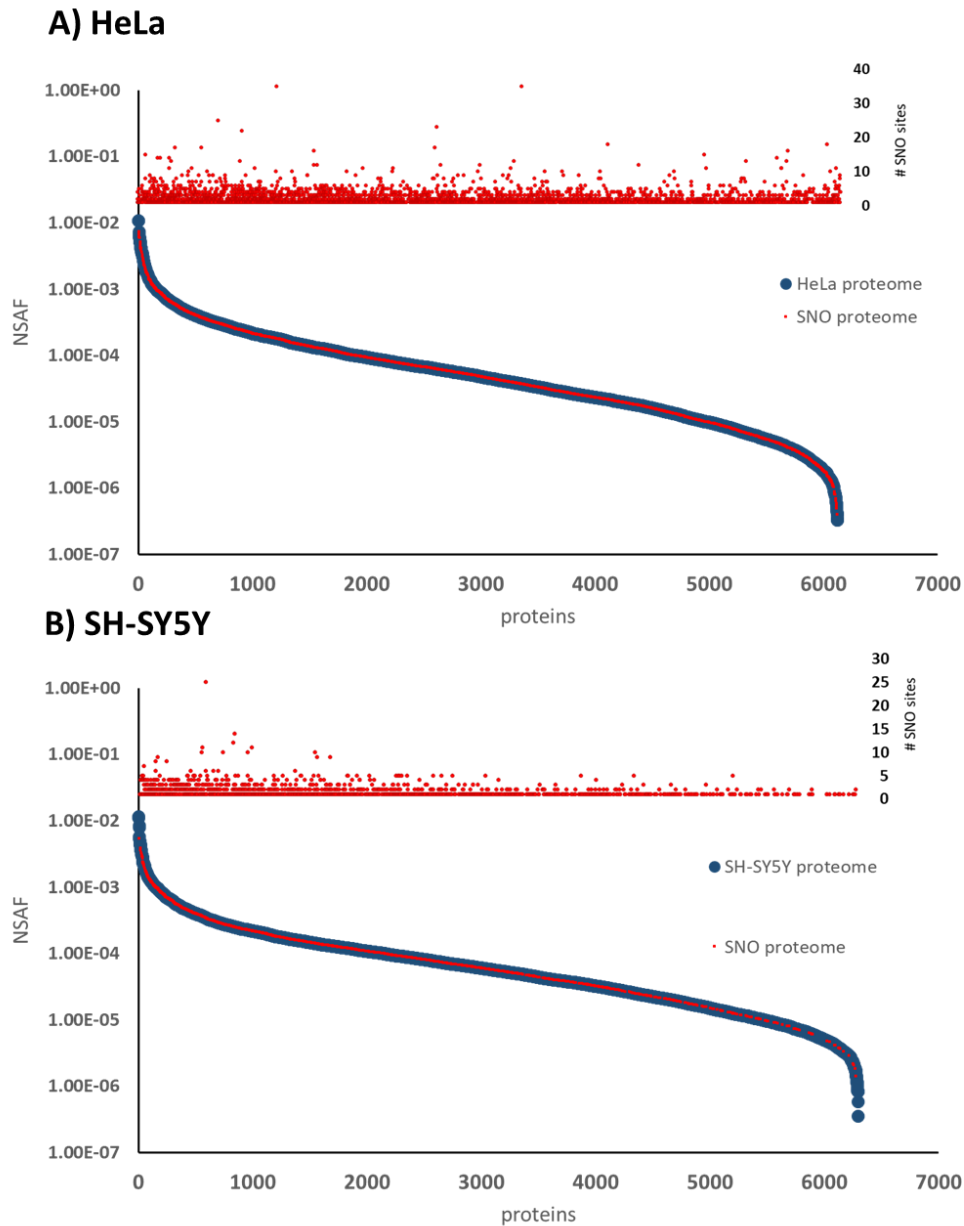

**Supplementary Figure 5.** Good coverage of the **a.** HeLa and **b.** SH-SY5Y SNO proteome. Proteome dynamic range represented by NSAF values (blue): Only proteins with at least 1 unique peptide (1% protein false discovery rate) were considered and ordered in descending abundance, as represented by descending NSAF values, corresponding to 6120 (HeLa) and 6294 (SH-SY5Y) proteins, respectively. SNO proteome (red): The NSAF values for proteins with quantified high confidence SNO sites are shown as red dots, corresponding to 3007 SNO proteins for HeLa and 1413 SNO proteins for SH-SY5Y. Notably, an additional 625 (HeLa) and 30 (SH-SY5Y) proteins with SNO sites are not represented in the graphs, as they were not detected with unique peptides in the global proteomes and therefore lack an NSAF value, indicating a presumably low abundance of this proteins. The quantified SNO sites clearly cover the whole dynamic range of the corresponding proteomes. Top: the number of quantified SNO sites per individual protein is plotted, representing 6247 HeLa and 2158 SH-SY5Y SNO sites. Source data are provided as a Source Data file.

## Supplementary Tables.

**Supplementary Table 1.** SNO consensus motifs identified by motif-x v1.2 for (a) GSNO non-reactive ( $R \leq 1.5$ ), (b) GSNO mild-reactive ( $1.5 < R < 6$ ; p-value  $\leq 0.05$ ), (c) GSNO hyper-reactive ( $R \geq 6$ ; p-value  $\leq 0.05$ ) SNO sites.

a. GSNO non-reactive SNO sites ( $R \leq 1.5$ ). Mappable 480, matched 362 (75 %)

| #  | Motif                | Motif Score | Foreground Matches | Foreground Size | Background Matches | Background Size | Fold Increase |
|----|----------------------|-------------|--------------------|-----------------|--------------------|-----------------|---------------|
| 1. | <u>.....CL..L...</u> | 24.71       | 41                 | 480             | 3831               | 315162          | 7.03          |
| 2. | <u>...L...C.....</u> | 15.35       | 101                | 439             | 30548              | 311331          | 2.34          |
| 3. | <u>...I...C.....</u> | 15.65       | 55                 | 338             | 12652              | 280783          | 3.61          |
| 4. | <u>...F...C.....</u> | 11.69       | 44                 | 283             | 12323              | 268131          | 3.38          |
| 5. | <u>...V...C.....</u> | 13.26       | 55                 | 239             | 19105              | 255808          | 3.08          |
| 6. | <u>.....CI.....</u>  | 9.82        | 29                 | 184             | 9134               | 236703          | 4.08          |
| 7. | <u>...L...C.....</u> | 7.32        | 37                 | 155             | 20818              | 227569          | 2.61          |

b. GSNO mild-reactive SNO sites ( $1.5 < R < 6$ ; p-value  $\leq 0.05$ ). Mappable 1,894, matched 283 (15 %)

| #  | Motif                | Motif Score | Foreground Matches | Foreground Size | Background Matches | Background Size | Fold Increase |
|----|----------------------|-------------|--------------------|-----------------|--------------------|-----------------|---------------|
| 1. | <u>.....C.....K.</u> | 10.53       | 156                | 1894            | 14849              | 315162          | 1.75          |
| 2. | <u>.K.....C.....</u> | 6.48        | 127                | 1738            | 13781              | 300313          | 1.59          |

c. GSNO hyper-reactive SNO sites ( $R \geq 6$ ; p-value  $\leq 0.05$ ). Mappable 3,446, matched 2826 (82 %).

| #   | Motif                  | Motif Score | Foreground Matches | Foreground Size | Background Matches | Background Size | Fold Increase |
|-----|------------------------|-------------|--------------------|-----------------|--------------------|-----------------|---------------|
| 1.  | <u>.....C...E...</u>   | 16.00       | 372                | 3446            | 17478              | 315162          | 1.95          |
| 2.  | <u>...E..C.....</u>    | 16.00       | 307                | 3074            | 15468              | 297684          | 1.92          |
| 3.  | <u>...D...C.....E.</u> | 23.09       | 35                 | 2767            | 762                | 282216          | 4.68          |
| 4.  | <u>...D..C..E....</u>  | 22.12       | 33                 | 2732            | 691                | 281454          | 4.92          |
| 5.  | <u>.....CE.....</u>    | 16.00       | 251                | 2699            | 14481              | 280763          | 1.80          |
| 6.  | <u>...D..C.....</u>    | 16.00       | 200                | 2448            | 9916               | 266282          | 2.19          |
| 7.  | <u>.....C..E....</u>   | 15.65       | 204                | 2248            | 12638              | 256366          | 1.84          |
| 8.  | <u>.....CD.....</u>    | 15.95       | 172                | 2044            | 10396              | 243728          | 1.97          |
| 9.  | <u>...E..C.....</u>    | 12.61       | 182                | 1872            | 12850              | 233332          | 1.77          |
| 10. | <u>...D..C.....</u>    | 13.72       | 137                | 1690            | 8820               | 220482          | 2.03          |
| 11. | <u>.....DC.....</u>    | 10.26       | 121                | 1553            | 8742               | 211662          | 1.89          |
| 12. | <u>.....C..D....</u>   | 10.51       | 118                | 1432            | 8709               | 202920          | 1.92          |
| 13. | <u>.....C.....E.</u>   | 9.75        | 125                | 1314            | 10139              | 194211          | 1.82          |
| 14. | <u>...E..C.....</u>    | 10.28       | 119                | 1189            | 9752               | 184072          | 1.89          |
| 15. | <u>.....C..D...</u>    | 9.94        | 88                 | 1070            | 6809               | 174320          | 2.11          |
| 16. | <u>.....C.D.....</u>   | 9.15        | 86                 | 982             | 7181               | 167511          | 2.04          |
| 17. | <u>.....CT.....</u>    | 6.45        | 86                 | 896             | 8700               | 160330          | 1.77          |
| 18. | <u>.....C.....D.</u>   | 6.91        | 66                 | 810             | 6160               | 151630          | 2.01          |
| 19. | <u>E.....C.....</u>    | 6.12        | 69                 | 744             | 7222               | 145470          | 1.87          |
| 20. | <u>D.....C.....</u>    | 6.59        | 55                 | 675             | 5324               | 138248          | 2.12          |

**Supplementary Table 2.** Table of comparison of SNO studies.

| Method      | Model system                                            | Number of SNO proteins/peptides/sites | Amount of starting material/condition [mg] | Quantification            | Year | Reference     |
|-------------|---------------------------------------------------------|---------------------------------------|--------------------------------------------|---------------------------|------|---------------|
| RAC         | CysNO treated HEK293 cells                              | 398 peptides                          | 1                                          | iTRAQ; MS2                | 2009 | 1             |
| SNO-RAC     | GSNO-treated mouse heart homogenates                    | 951 proteins, ~2000 sites             | 1                                          | Label-free; MS1           | 2011 | 2             |
| SNO-RAC     | GSNO-treated mouse skeletal muscle homogenates          | 488 sites                             | 0.5                                        | iTRAQ; MS2                | 2013 | 3             |
| SNO-RAC     | Cys-NO treated nuclear extracts of rat cortical neurons | 614 proteins                          | 0.4                                        | N/a                       | 2018 | 4             |
| SNO ICAT    | SNO-Trx1-treated SH-SY5Y cell lysate                    | 50-76 sites                           | 0.3                                        | Light and heavy ICAT; MS1 | 2011 | 5             |
| SNO ICAT    | normoxic mouse heart                                    | 907 sites                             | N/a                                        | Light and heavy ICAT; MS1 | 2017 | 6             |
| iodoTMT     | CysNO-treated BV-2 cells; LPS-stimulated BV-2 cells     | 134 sites; 101 sites                  | 0.4                                        | TMT; MS2                  | 2014 | 7             |
| iodoTMT     | rat cardiomyocyte under hypoxia                         | 169 proteins, 266 sites               | 0.3                                        | TMT; MS2                  | 2014 | 8             |
| HPDP-biotin | CysNO-treated NPrEC cells                               | 81 sites                              | 1                                          | N/a                       | 2010 | 9             |
| HPDP-biotin | LPS and IFN- $\gamma$ -treated RAW264.7 cells           | 156 proteins                          | 1                                          | SILAC; MS1                | 2012 | 10            |
| CysPAT      | GSNO treated RAW 264.7 cell extracts                    | 795 proteins, 1450 peptides           | 0.4                                        | N/a                       | 2018 | 11            |
| Cys-BOOST   | GSNO-treated HeLa cell extracts                         | 3632 proteins, 8304 sites             | 0.3                                        | TMT; MS2                  | 2019 | current study |
| Cys-BOOST   | SNAP-treated SH-SY5Y cells                              | 1443 proteins, 2158 sites             | 0.25                                       | TMT; MS3                  | 2019 | current study |



## Supplementary References.

1. Forrester, M.T. et al. Proteomic analysis of S-nitrosylation and denitrosylation by resin-assisted capture. *Nat Biotechnol* **27**, 557-559 (2009).
2. Kohr, M.J. et al. Characterization of potential S-nitrosylation sites in the myocardium. *Am J Physiol Heart Circ Physiol* **300**, H1327-1335 (2011).
3. Su, D. et al. Quantitative site-specific reactivity profiling of S-nitrosylation in mouse skeletal muscle using cysteinyl peptide enrichment coupled with mass spectrometry. *Free Radic Biol Med* **57**, 68-78 (2013).
4. Smith, J.G. et al. Proteomic analysis of S-nitrosylated nuclear proteins in rat cortical neurons. *Sci Signal* **11** (2018).
5. Wu, C. et al. Distinction of thioredoxin transnitrosylation and denitrosylation target proteins by the ICAT quantitative approach. *J Proteomics* **74**, 2498-2509 (2011).
6. Chouchani, E.T. et al. Identification and quantification of protein S-nitrosation by nitrite in the mouse heart during ischemia. *J Biol Chem* **292**, 14486-14495 (2017).
7. Qu, Z. et al. Proteomic Quantification and Site-Mapping of S-Nitrosylated Proteins Using Isobaric iodoTMT Reagents. *Journal of Proteome Research* **13**, 3200-3211 (2014).
8. Pan, K.T. et al. Mass spectrometry-based quantitative proteomics for dissecting multiplexed redox cysteine modifications in nitric oxide-protected cardiomyocyte under hypoxia. *Antioxid Redox Signal* **20**, 1365-1381 (2014).
9. Lam, Y.W. et al. Comprehensive identification and modified-site mapping of S-nitrosylated targets in prostate epithelial cells. *PLoS One* **5**, e9075 (2010).
10. Torta, F. & Bachi, A. Quantitative analysis of S-nitrosylated proteins. *Methods Mol Biol* **893**, 405-416 (2012).
11. Ibanez-Vea, M. et al. Characterization of Macrophage Endogenous S-Nitrosoproteome Using a Cysteine-Specific Phosphonate Adaptable Tag in Combination with TiO<sub>2</sub> Chromatography. *J Proteome Res* **17**, 1172-1182 (2018).
